# Supplementary material for: Evolutionary Stabilization of Cooperative Toxin Production through a Bacterium-Plasmid-Phage Interplay
Source: PubMed Central journal article supplement (PMC7374059; doi:10.1128/mbio.00912-20), 2020-07-21
Supplement: mBio.00912-20-sf002.pdf [file mBio.00912-20-sf002.pdf]

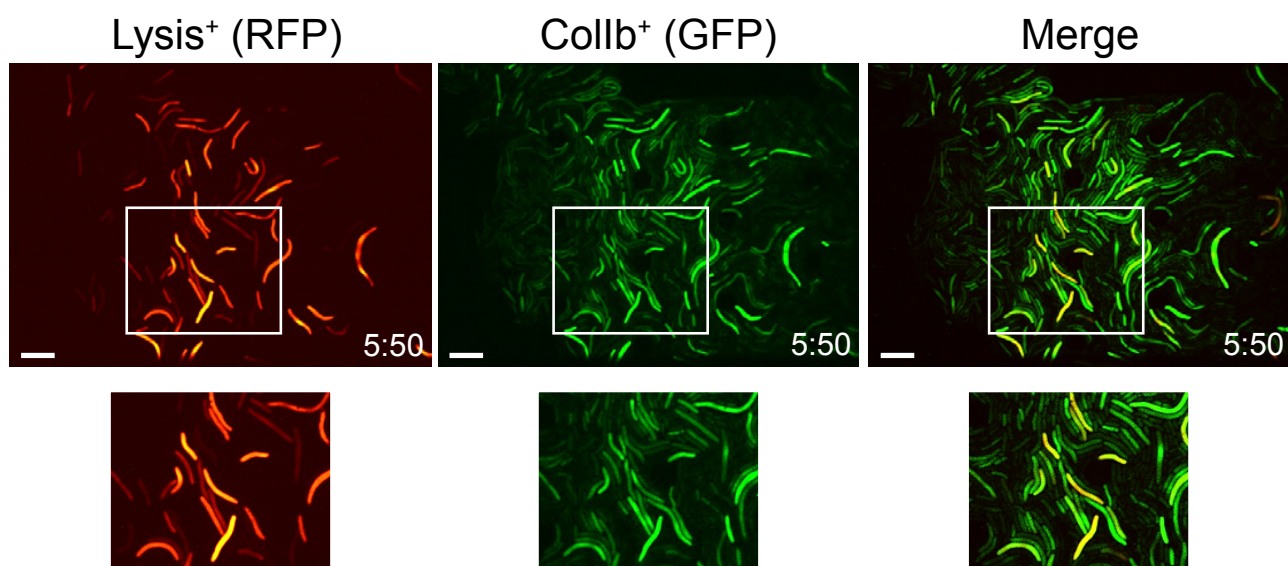

Fig. S2. Examples of live cell microscopy showing ST64B prophage lysis gene and *cib* expressing individual *S. Tm*<sup>lysST::T7 pol</sup> bacteria. Initially, microcolonies of *S. Tm*<sup>lysST::T7 pol p<sup>PT7</sup> rfp P<sub>cib</sub> gfp</sup> were cultured in microfluidic plates for 3 h in LB only. Subsequently, media was exchanged against LB supplemented with 100  $\mu$ M DTPA for 20 min to induce *cib* expression of bacteria. Next LB supplemented with 100  $\mu$ M DTPA and 0.5  $\mu$ g/ml was applied to induce the bacterial SOS-response and thus full expression of *cib* and the expression of ST64B prophage lysis genes. After 20 min, the medium was changed back to LB supplemented with 100  $\mu$ M DTPA only, for the remaining time of the experiment. Images show that only a small fraction of the *S. Tm*<sup>lysST::T7 pol p<sup>PT7</sup> rfp P<sub>cib</sub> gfp</sup> population expresses *cib* (*gfp*) and ST64B prophage lysis genes (*rfp*), simultaneously.
