# Supplementary material for: Evolutionary Stabilization of Cooperative Toxin Production through a Bacterium-Plasmid-Phage Interplay
Source: PubMed Central journal article supplement (PMC7374059; doi:10.1128/mbio.00912-20), 2020-07-21
Supplement: mBio.00912-20-st003.pdf [file mBio.00912-20-st003.pdf]

**Table S3. Parameter values used**

| <i>Name</i>         | <i>Value</i>                     | <i>Definition</i>                                                                                | <i>Reference</i> |
|---------------------|----------------------------------|--------------------------------------------------------------------------------------------------|------------------|
| $D$                 | $1/h$                            | dilution rate                                                                                    |                  |
| $s_0$               | $10^8 U/ml$                      | inflow concentration <i>Salmonella</i>                                                           |                  |
| $e_0$               | $10^8 U/ml$                      | inflow concentration competitor                                                                  |                  |
| $r$                 | $1/h$                            | growth rate <i>Salmonella</i>                                                                    | (14)             |
| $r_e$               | $1.2/h$                          | growth rate competitor                                                                           | <sup>1</sup>     |
| $K$                 | $2 \cdot 10^9 U/ml$              | carrying capacity                                                                                | (15)             |
| $\beta$             | $3 \cdot 10^{-8} ml/(U h)$       | infection rate plasmids                                                                          | (16)             |
| $\lambda$           | $3.5 \cdot 10^{-10} ml/(U h)$    | infection rate phages                                                                            | (15)             |
| $\rho$              | 0.01                             | fraction of newly infected cells that become lysogenic                                           | (17)             |
| $\psi$              | $8.318 \cdot 10^{14} ml/(h mol)$ | rate at which colicin kills                                                                      | <sup>2</sup>     |
| $\delta_{Stress}$   | $10^{-3}/h$                      | rate of lysogenic cells to lyse during stress                                                    | (15)             |
| $\delta_{noStress}$ | $0/h$                            | rate of lysogenic cells to lyse during no stress                                                 |                  |
| $\delta(t)$         |                                  | equals $\delta_{noStress}$ for no stress conditions, and $\delta_{Stress}$ in stress conditions. |                  |
| $\gamma_{\Phi}$     | $0.0044/h$                       | degradation rate of free phages                                                                  | (15)             |
| $\gamma_C$          | $0.044/h$                        | degradation rate of colicin                                                                      | (14)             |
| $L$                 | 75                               | burst size (amplification factor of phages)                                                      | (18)             |
| $L_C$               | $1.661 \cdot 10^{-20} mol/U$     | amount of colicin released by lysis of cells with plasmids                                       | <sup>3</sup>     |
| $\zeta_{act}$       | $2/h$                            | activation of colicin production (stress)                                                        | <sup>4</sup>     |
| $\zeta_{deAct}$     | $2/h$                            | de-activation of colicin production (no stress)                                                  | <sup>4</sup>     |
| $T$                 | 50 h                             | period of inflow/stress                                                                          |                  |
| $t \in [0, T/2]$    |                                  | acute infectious conditions (inflow)                                                             |                  |

- <sup>1</sup> The competitor is assumed to have a higher growth rate than *Salmonella* (in accordance with experimental data).
- <sup>2</sup> The parameter  $\psi$  is a constant of proportionality. Given a colicin concentration  $C$ , the death rate for bacteria is  $\psi C$ . It was assumed that half of the bacteria die after 5 minutes if considerable amounts of colicin are present, which corresponds to a death rate of  $8.318/h$ . The colicin concentration in our simulations varies over magnitudes, between zero and maxima around  $10^{-12}$  mol/ml). Often, it is in the range of  $10^{-14} - 10^{-15}$  mol/ml. Therefore, we choose  $\psi = 8.318/(10^{-14}h \text{ mol/ml})$ .
- <sup>3</sup> Based on the assumption that 10,000 molecules of colicin are released by lysis of cells with plasmids.
- <sup>4</sup> The reaction time of cells to react to the presence respectively absence of stress is assumed to be about 1/2 h.
